# Supplementary material for: Exploration of grape pomace peels and amaranth flours as functional ingredients in the elaboration of breads: phenolic composition, bioaccessibility, and antioxidant activity
Source: Royal Society of Chemistry journal article supplement (doi:10.1039/d3fo04494g), 2023-12-05
Supplement: d3fo04494g1.pdf [file d3fo04494g1.pdf]

### 1S. RP-HPLC quantification of phenolic compounds of flours

| mg g d.m.-1                      | MeOH/H <sub>2</sub> O 70/30 EXTRACTS |                   |                 | MeOH/HCl 97/3 EXTRACTS |                 |                 |
|----------------------------------|--------------------------------------|-------------------|-----------------|------------------------|-----------------|-----------------|
|                                  | WF                                   | AF                | GP              | WF                     | AF              | GP              |
| <b>Non-anthocyanidic phenols</b> |                                      |                   |                 |                        |                 |                 |
| <b>HYDROXYBENZOIC ACIDS</b>      | <b>35 %</b>                          | <b>11 %</b>       | <b>9 %</b>      |                        | <b>0.003 %</b>  | <b>1 %</b>      |
| Gallic acid                      | 0.109 ± 0.009                        | 0.0427 ± 0.003    | 0.123 ± 0.004   |                        | 0.002 ± 0.0003  | 0.029 ± 0.003   |
| Syringic acid                    | 0.014 ± 0.009                        | 0.0086 ± 0.001    | 0.117 ± 0.005   |                        |                 | 0.156 ± 0.013   |
| <b>HYDROXYCINNAMIC ACIDS</b>     | <b>31 %</b>                          | <b>7 %</b>        | <b>23 %</b>     |                        | <b>0.01 %</b>   | <b>29 %</b>     |
| Cinamic acid                     |                                      |                   |                 |                        |                 |                 |
| Caftaric acid                    |                                      |                   |                 |                        |                 | 6.9 ± 0.23      |
| Caffeic acid                     | 0.0982 ± 0.0004                      |                   | 0.64 ± 0.01     |                        |                 | 0.031 ± 0.004   |
| Ferulic acid                     | 0.005 ± 0.002                        | 0.027 ± 0.001     |                 |                        | 0.0088 ± 0.0002 | 0.0127 ± 0.0005 |
| p-coumaric acid                  | 0.004 ± 0.001                        | 0.006 ± 0.0003    |                 |                        |                 |                 |
| <b>STILBENES</b>                 |                                      |                   | <b>0.5 %</b>    |                        | <b>0.05 %</b>   | <b>0.1 %</b>    |
| Trans-piceatannol                |                                      |                   |                 |                        | 0.0311 ± 0.0005 |                 |
| pterostilbene                    |                                      |                   |                 |                        | 0.003 ± 0.002   |                 |
| trans-resveratrol                |                                      |                   | 0.0148 ± 0.0016 |                        |                 | 0.0196 ± 0.0004 |
| <b>FLAVANOLS</b>                 | <b>25 %</b>                          | <b>20 %</b>       | <b>51 %</b>     | <b>100 %</b>           | <b>99 %</b>     | <b>69 %</b>     |
| Procyanidin B1                   |                                      |                   | 0.045 ± 0.004   |                        |                 | 0.0043 ± 0.0002 |
| (+)-catechin                     |                                      |                   | 0.76 ± 0.09     |                        |                 | 0.0232 ± 0.0005 |
| Procyanidin B2                   |                                      |                   | 0.088 ± 0.008   |                        | 0.0168 ± 0.0006 | 0.0021 ± 0.0001 |
| (-)-epicatechin                  |                                      |                   | 0.32 ± 0.05     |                        |                 | 0.0024 ± 0.0001 |
| (-)-epigallocatechin             |                                      |                   |                 | 14 ± 2                 | 63 ± 4          | 16.4 ± 0.5      |
| (-)-epigallocatechin gallate     |                                      | 0.098 ± 0.001     |                 | 0.0047 ± 0.0001        | 0.0197 ± 0.0009 |                 |
| (-)-gallocatechin gallate        | 0.0892 ± 0.0004                      |                   | 0.094 ± 0.008   | 0.0244 ± 0.0002        | 0.0769 ± 0.0027 |                 |
| Astilbin                         |                                      |                   | 0.104 ± 0.001   |                        |                 |                 |
| <b>FLAVANONES</b>                |                                      | <b>27 %</b>       | <b>2 %</b>      |                        | <b>0.2 %</b>    |                 |
| Naringin                         |                                      | 0.0305 ± 0.0012   | 0.063 ± 0.0008  |                        | 0.108 ± 0.009   |                 |
| Naringenin                       |                                      | 0.09768 ± 0.0036  |                 |                        |                 |                 |
| <b>FLAVONOLS</b>                 | <b>9 %</b>                           | <b>12 %</b>       | <b>15 %</b>     |                        | <b>0.3 %</b>    | <b>0.6 %</b>    |
| Rutin-trihidrate                 | 0.032 ± 0.006                        | 0.031 ± 0.002     |                 |                        |                 |                 |
| Quercetin-3-glucoside            |                                      | 0.009 ± 0.002     | 0.065 ± 0.005   |                        | 0.16 ± 0.03     |                 |
| Kaempferol-3-glucoside           |                                      | 0.01622 ± 0.00002 | 0.164 ± 0.004   |                        |                 | 0.032 ± 0.003   |
| Myricetin                        |                                      |                   | 0.052 ± 0.001   |                        |                 | 0.072 ± 0.007   |
| Quercetin hydrate                |                                      |                   | 0.133 ± 0.01    |                        |                 | 0.031 ± 0.002   |
| Quercetin 3-β-D-galactoside      |                                      |                   |                 |                        |                 |                 |
| <b>CHALCONES</b>                 |                                      | <b>24 %</b>       |                 |                        |                 |                 |
| Phloridzin                       |                                      | 0.113 ± 0.006     |                 |                        |                 |                 |
| <b>OTHER COMPOUNDS</b>           |                                      |                   |                 |                        | <b>0.04 %</b>   | <b>0.2 %</b>    |
| OH-Tyrosol                       |                                      |                   |                 |                        | 0.027 ± 0.003   | 0.044 ± 0.003   |
| Tyrosol                          |                                      |                   |                 |                        |                 | 0.0023 ± 0.0002 |
| <b>TOTAL (Non-anthocyanidic)</b> | <b>0.4</b>                           | <b>0.5</b>        | <b>3</b>        | <b>14</b>              | <b>63</b>       | <b>24</b>       |

| EXTRACTS                         | MeOH/H <sub>2</sub> O 70/30 |               | MeOH/HCl 97/3 |    |
|----------------------------------|-----------------------------|---------------|---------------|----|
|                                  | GP                          | GP            | GP            | GP |
| <b>Anthocyanidic polyphenols</b> |                             |               |               |    |
| <b>Glucosylated</b>              | <b>57 %</b>                 | <b>92 %</b>   |               |    |
| Del-3-G                          | 0.37 ± 0.01                 | 0.28 ± 0.02   |               |    |
| Cya-3-G                          | 0.131 ± 0.003               | 0.15 ± 0.01   |               |    |
| Pet-3-G                          | 0.436 ± 0.003               | 0.9 ± 0.1     |               |    |
| Peo-3-G                          | 0.4 ± 0.02                  | 0.9 ± 0.1     |               |    |
| Mal-3-G                          | 3.25 ± 0.08                 | 9.0 ± 0.7     |               |    |
| <b>Acylylated</b>                | <b>29 %</b>                 | <b>3 %</b>    |               |    |
| Del-3-acet                       | 0.175 ± 0.005               |               |               |    |
| Peo-3-acet                       | 0.234 ± 0.002               | 0.023 ± 0.004 |               |    |
| Pet-3-acet                       |                             | 0.321 ± 0.003 |               |    |
| Mal-3-acet                       | 1.9 ± 0.08                  | 0.021 ± 0.002 |               |    |
| <b>Coumaroylated</b>             | <b>14 %</b>                 | <b>5 %</b>    |               |    |
| Pet-3-p.cou                      | 0.108 ± 0.001               |               |               |    |
| Cya-3-p.cou                      | 0.322 ± 0.011               | 0.17 ± 0.04   |               |    |
| Peo-3-p.cou                      | 0.131 ± 0.004               | 0.05 ± 0.01   |               |    |
| Mal-3-p.cou                      | 0.536 ± 0.015               | 0.4 ± 0.1     |               |    |
| <b>TOTAL (Anthocyanidic)</b>     | <b>8</b>                    | <b>12</b>     |               |    |

## 2S. RP-HPLC quantification of phenolic compounds of breads

| mg g d.m.-1                      | MeOH/H <sub>2</sub> O 70/30 EXTRACTS |                |                 |                 | MeOH/HCl 97/3 EXTRACTS |                 |                 |                   |
|----------------------------------|--------------------------------------|----------------|-----------------|-----------------|------------------------|-----------------|-----------------|-------------------|
|                                  | C                                    | A20            | GP5             | A20GP5          | C                      | A20             | GP5             | A20GP5            |
| <b>Non-anthocyanidic phenols</b> | <b>8 %</b>                           | <b>14 %</b>    | <b>26 %</b>     | <b>34 %</b>     |                        |                 |                 |                   |
| <b>HYDROXYBENZOIC ACIDS</b>      |                                      |                |                 |                 |                        |                 | <b>0.03 %</b>   | <b>0.03 %</b>     |
| Gallic acid                      | 0.07 ± 0.02                          | 0.3 ± 0.2      | 0.2 ± 0.1       | 0.27 ± 0.17     |                        |                 |                 | 0.007 ± 0.002     |
| Syringic acid                    | 0.14 ± 0.14                          | 0.2 ± 0.1      | 0.065 ± 0.001   | 0.057 ± 0.002   |                        |                 | 0.0134 ± 0.0005 | 0.0149 ± 0.0008   |
| <b>HYDROXYCINNAMIC ACIDS</b>     | <b>76 %</b>                          | <b>74 %</b>    | <b>29 %</b>     | <b>30 %</b>     |                        | <b>0.04 %</b>   | <b>0.3 %</b>    | <b>0.2 %</b>      |
| Cinamic acid                     |                                      |                |                 |                 |                        |                 |                 |                   |
| Caffaric acid                    |                                      |                |                 |                 |                        | 0.013 ± 0.002   | 0.129 ± 0.002   | 0.114 ± 0.003     |
| Caffeic acid                     | 2.2 ± 0.1                            | 2.5 ± 0.3      | 0.3 ± 0.1       | 0.3 ± 0.1       |                        | 0.014 ± 0.004   |                 | 0.005 ± 0.002     |
| Ferulic acid                     |                                      | 0.007 ± 0.001  | 0.0078 ± 0.002  | 0.0029 ± 0.0004 |                        |                 |                 |                   |
| p-coumaric acid                  |                                      | 0.0091 ± 0.001 | 0.0037 ± 0.0006 | 0.011 ± 0.001   |                        |                 |                 |                   |
| <b>STILBENES</b>                 |                                      |                |                 |                 |                        | <b>0.01 %</b>   |                 | <b>0.01 %</b>     |
| Trans-piceatannol                |                                      |                |                 |                 |                        | 0.0056 ± 0.0002 |                 | 0.00685 ± 0.00003 |
| pterostilbene                    |                                      |                |                 |                 |                        |                 |                 |                   |
| trans-resveratrol                |                                      |                |                 |                 |                        |                 |                 |                   |
| <b>FLAVANOLS</b>                 | <b>13 %</b>                          | <b>4 %</b>     | <b>42 %</b>     | <b>34 %</b>     | <b>99.9 %</b>          | <b>99.9 %</b>   | <b>99.7 %</b>   | <b>99.7 %</b>     |
| Procyanidin B1                   | 0.13 ± 0.05                          | 0.089 ± 0.005  | 0.08 ± 0.01     | 0.069 ± 0.005   |                        |                 |                 |                   |
| (+)-catechin                     |                                      |                | 0.16 ± 0.02     | 0.11 ± 0.03     |                        |                 |                 |                   |
| Procyanidin B2                   |                                      |                | 0.0230 ± 0.0001 | 0.016 ± 0.004   |                        | 0.0031 ± 0.0003 | 0.0022 ± 0.0001 | 0.0044 ± 0.0002   |
| (-)-epicatechin                  |                                      |                | 0.07 ± 0.01     | 0.05 ± 0.01     |                        |                 | 0.0017 ± 0.0001 |                   |
| (-)-epigallocatechin             |                                      |                |                 |                 | 33 ± 2                 | 62 ± 21         | 51 ± 3          | 74 ± 6            |
| (-)-epigallocatechin gallate     |                                      | 0.057 ± 0.006  |                 |                 |                        | 0.01 ± 0.003    |                 |                   |
| (-)-gallocatechin gallate        | 0.09 ± 0.01                          |                | 0.083 ± 0.013   | 0.065 ± 0.004   |                        | 0.117 ± 0.0007  |                 |                   |
| Astilbin                         | 0.15 ± 0.04                          |                | 0.028 ± 0.003   | 0.018 ± 0.001   |                        |                 |                 |                   |
| <b>FLAVANONES</b>                |                                      | <b>2 %</b>     | <b>2 %</b>      | <b>2 %</b>      |                        | <b>0.03 %</b>   |                 | <b>0.02 %</b>     |
| Naringin                         |                                      | 0.021 ± 0.007  | 0.0177 ± 0.0004 | 0.018 ± 0.001   |                        | 0.018 ± 0.003   |                 | 0.017 ± 0.003     |
| Naringenin                       |                                      | 0.038 ± 0.008  |                 |                 |                        |                 |                 |                   |
| <b>FLAVONOLS</b>                 | <b>4 %</b>                           | <b>5 %</b>     | <b>1 %</b>      |                 | <b>0.1 %</b>           | <b>0.1 %</b>    |                 | <b>0.08 %</b>     |
| Rutin-trihidrate                 | 0.046 ± 0.008                        | 0.066 ± 0.002  | 0.0065 ± 0.0005 |                 |                        |                 |                 |                   |
| Quercetin-3-glucoside            |                                      |                |                 |                 | 0.018 ± 0.003          | 0.032 ± 0.005   |                 | 0.033 ± 0.001     |
| Kaempferol-3-glucoside           |                                      |                | 0.0073 ± 0.0003 |                 |                        |                 |                 |                   |
| Myricetin                        | 0.072 ± 0.006                        | 0.1 ± 0.05     |                 |                 |                        |                 |                 | 0.0132 ± 0.0002   |
| Quercetin hydrate                |                                      |                |                 |                 |                        |                 |                 | 0.0145 ± 0.0001   |
| Quercetin 3-β-D-galactoside      |                                      |                |                 |                 |                        |                 |                 |                   |
| <b>CHALCONES</b>                 |                                      | <b>1 %</b>     |                 |                 |                        |                 |                 |                   |
| Phloridzin                       |                                      | 0.03 ± 0.01    |                 |                 |                        |                 |                 |                   |
| <b>OTHER COMPOUNDS</b>           |                                      |                |                 |                 |                        |                 |                 | <b>0.002 %</b>    |
| OH-Tyrosol                       |                                      |                |                 |                 |                        |                 |                 | 0.00085 ± 0.00002 |
| Tyrosol                          |                                      |                |                 |                 |                        |                 |                 | 0.00095 ± 0.00008 |
| <b>TOTAL (Non-anthocyanidic)</b> | <b>2.9</b>                           | <b>3.4</b>     | <b>1</b>        | <b>1</b>        | <b>33</b>              | <b>62</b>       | <b>51</b>       | <b>74</b>         |

| EXTRACTS                         | MeOH/H <sub>2</sub> O 70/30 |                 | MeOH/HCl 97/3  |                 |
|----------------------------------|-----------------------------|-----------------|----------------|-----------------|
|                                  | GP5                         | A20GP5          | GP5            | A20GP5          |
| <b>Anthocyanidic polyphenols</b> | <b>49 %</b>                 | <b>49 %</b>     | <b>69 %</b>    | <b>37 %</b>     |
| <b>Glucosylated</b>              |                             |                 |                |                 |
| Del-3-G                          | 0.126 ± 0.001               | 0.122 ± 0.001   | 0.13 ± 0.01    |                 |
| Cya-3-G                          | 0.1186 ± 0.0001             | 0.116 ± 0.001   | 0.0354 ± 0.002 |                 |
| Pet-3-G                          | 0.132 ± 0.003               | 0.1278 ± 0.0004 | 0.5 ± 0.05     |                 |
| Peo-3-G                          | 0.132 ± 0.003               | 0.1300 ± 0.0001 | 0.14 ± 0.01    |                 |
| Mal-3-G                          | 0.29 ± 0.02                 | 0.27 ± 0.02     | 2.0 ± 0.2      | 0.0203 ± 0.0005 |
| <b>Acylated</b>                  | <b>28 %</b>                 | <b>27 %</b>     | <b>5 %</b>     | <b>63 %</b>     |
| Del-3-acet                       | 0.1175 ± 0.0003             | 0.117 ± 0.001   | 0.10 ± 0.01    |                 |
| Peo-3-acet                       | 0.122 ± 0.002               | 0.119 ± 0.002   | 0.07 ± 0.01    | 0.0195 ± 0.0005 |
| Pet-3-acet                       |                             |                 | 0.07 ± 0.01    |                 |
| Mal-3-acet                       | 0.21 ± 0.01                 | 0.186 ± 0.007   | 0.021 ± 0.001  | 0.0153 ± 0.0003 |
| <b>Coumaroylated</b>             | <b>23 %</b>                 | <b>24 %</b>     | <b>26 %</b>    |                 |
| Pet-3-p cou                      |                             |                 |                |                 |
| Cya-3-p cou                      | 0.1233 ± 0.0005             | 0.123 ± 0.002   | 0.08 ± 0.01    |                 |
| Peo-3-p cou                      | 0.1169 ± 0.0005             | 0.117 ± 0.001   | 0.09 ± 0.01    |                 |
| Mal-3-p cou                      | 0.136 ± 0.004               | 0.133 ± 0.001   | 0.9 ± 0.1      |                 |
| <b>TOTAL (Anthocyanidic)</b>     | <b>1.6</b>                  | <b>1.6</b>      | <b>4</b>       | <b>0.06</b>     |

### 3S. RP-HPLC quantification of phenolic compounds of gastrointestinal digests of breads

| mg g d.m.-1                      | MeOH/H <sub>2</sub> O 70/30 EXTRACTS |                 |                 |               | MeOH/HCl 97/3 EXTRACTS |                 |                   |                 |
|----------------------------------|--------------------------------------|-----------------|-----------------|---------------|------------------------|-----------------|-------------------|-----------------|
|                                  | DC                                   | DA20            | DGP5            | DA20GP5       | DC                     | DA20            | DGP5              | DA20GP5         |
| <b>Non-anthocyanidic phenols</b> |                                      |                 |                 |               |                        |                 |                   |                 |
| <b>HYDROXYBENZOIC ACIDS</b>      |                                      | 18 %            | 25 %            |               |                        | 0.1 %           | 0.01 %            | 0.005 %         |
| Gallic acid                      |                                      | 0.022 ± 0.001   | 0.030 ± 0.001   |               |                        | 0.42 ± 0.02     | 0.07 ± 0.02       | 0.0015 ± 0.0005 |
| Syringic acid                    |                                      |                 | 0.15 ± 0.07     |               |                        |                 | 0.0007 ± 0.0003   | 0.013 ± 0.006   |
| <b>HYDROXYCINNAMIC ACIDS</b>     | 8 %                                  |                 | 53 %            |               |                        | 0.02 %          |                   | 0.03 %          |
| Cinamic acid                     |                                      |                 |                 |               |                        |                 |                   |                 |
| Caftaric acid                    |                                      |                 |                 |               |                        | 0.0393 ± 0.0001 | 0.133 ± 0.003     | 0.07 ± 0.01     |
| Caffeic acid                     |                                      |                 | 0.3 ± 0.2       |               |                        | 0.032 ± 0.002   |                   | 0.02 ± 0.01     |
| Ferulic acid                     | 0.016 ± 0.001                        |                 | 0.0124 ± 0.0004 |               |                        |                 |                   |                 |
| p-coumaric acid                  | 0.0039 ± 0.003                       |                 | 0.0156 ± 0.0002 |               |                        |                 |                   |                 |
| <b>STILBENES</b>                 |                                      |                 |                 |               |                        | 0.03 %          | 0.1 %             | 0.04 %          |
| Trans-piceatannol                |                                      |                 |                 |               |                        | 0.0071 ± 0.0006 |                   |                 |
| pterostilbeno                    |                                      |                 |                 |               |                        | 0.088 ± 0.002   | 0.473 ± 0.008     | 0.10 ± 0.02     |
| trans-resveratrol                |                                      |                 |                 |               |                        |                 |                   |                 |
| <b>FLAVANOLS</b>                 | 18 %                                 | 62 %            | 22 %            | 85 %          | 99.98 %                | 99.8 %          | 99.88 %           | 99.9 %          |
| Procyanidin B1                   |                                      |                 | 0.040 ± 0.001   |               |                        |                 |                   |                 |
| (+)-catechin                     |                                      |                 | 0.024 ± 0.002   |               |                        |                 |                   |                 |
| Procyanidin B2                   |                                      | 0.0165 ± 0.0003 | 0.027 ± 0.004   |               | 0.0031 ± 0.0004        | 0.01 ± 0.001    |                   | 0.0021 ± 0.0002 |
| (-)-epicatechin                  |                                      |                 | 0.025 ± 0.003   |               | 0.07 ± 0.03            | 0.054 ± 0.002   | 0.0056 ± 0.0001   | 0.004 ± 0.002   |
| (-)-epigallocatechin             |                                      |                 |                 |               | 480 ± 151              | 354 ± 8         | 576 ± 2           | 268 ± 6         |
| (-)-epigallocatechin gallate     | 0.043 ± 0.002                        |                 |                 | 0.078 ± 0.001 | 0.03 ± 0.02            |                 | 0.043 ± 0.001     | 0.025 ± 0.001   |
| (-)-gallocatechin gallate        |                                      | 0.060 ± 0.001   |                 | 0.062 ± 0.001 |                        |                 |                   |                 |
| Astilbin                         |                                      |                 |                 |               |                        |                 |                   |                 |
| <b>FLAVANONES</b>                |                                      |                 |                 |               |                        | 0.004 %         | 0.003 %           | 0.003 %         |
| Naringin                         |                                      |                 |                 |               |                        |                 | 0.0179 ± 0.0002   | 0.007 ± 0.003   |
| Naringenin                       |                                      |                 |                 |               |                        | 0.015 ± 0.002   |                   |                 |
| <b>FLAVONOLS</b>                 | 73 %                                 | 20 %            | 0.1 %           | 15 %          | 0.002 %                |                 | 0.001 %           | 0.005 %         |
| Rutin-trihidrate                 | 0.174 ± 0.01                         |                 |                 | 0.024 ± 0.006 |                        |                 |                   | 0.015 ± 0.008   |
| Quercetin-3-glucoside            |                                      | 0.025 ± 0.006   | 0.0010 ± 0.0003 |               |                        |                 |                   |                 |
| Kaempferol-3-glucoside           |                                      |                 |                 |               |                        |                 |                   |                 |
| Myricetin                        |                                      |                 |                 |               | 0.0077 ± 0.0001        |                 | 0.00679 ± 0.00002 |                 |
| Quercetin hydrate                |                                      |                 |                 |               |                        |                 |                   |                 |
| Quercetin 3-β-D-galactoside      |                                      |                 |                 |               |                        |                 |                   |                 |
| <b>CHALCONES</b>                 |                                      |                 |                 |               |                        |                 |                   |                 |
| Phloridzin                       |                                      |                 |                 |               |                        |                 |                   |                 |
| <b>OTHER COMPOUNDS</b>           |                                      |                 |                 |               |                        | 0.02 %          |                   | 0.002 %         |
| OH-Tyrosol                       |                                      |                 |                 |               |                        | 0.061 ± 0.006   |                   | 0.005 ± 0.001   |
| Tyrosol                          |                                      |                 |                 |               |                        |                 |                   |                 |
| <b>TOTAL (Non-anthocyanidic)</b> | 0.2                                  | 0.1             | 0.7             | 0.16          | 480                    | 355             | 577               | 268             |

| EXTRACTS                         | MeOH/H <sub>2</sub> O 70/30 |                 | MeOH/HCl 97/3     |                 |
|----------------------------------|-----------------------------|-----------------|-------------------|-----------------|
|                                  | DGP5                        | DA20GP5         | DGP5              | DA20GP5         |
| <b>Anthocyanidic polyphenols</b> | 35 %                        | 62 %            | 63 %              | 64 %            |
| Glucosylated                     |                             |                 |                   |                 |
| Del-3-G                          |                             | 0.154 ± 0.004   |                   | 0.0163 ± 0.0005 |
| Cya-3-G                          |                             |                 |                   |                 |
| Pet-3-G                          |                             | 0.154 ± 0.004   | 0.0109 ± 0.0003   |                 |
| Peo-3-G                          |                             | 0.1501 ± 0.0003 | 0.012 ± 0.0003    | 0.012 ± 0.002   |
| Mal-3-G                          | 0.104 ± 0.001               | 0.288 ± 0.009   | 0.037 ± 0.002     | 0.016 ± 0.001   |
| Acyalted                         | 32 %                        | 25 %            | 12 %              |                 |
| Del-3-acet                       |                             |                 |                   |                 |
| Peo-3-acet                       |                             |                 |                   |                 |
| Pet-3-acet                       |                             | 0.151 ± 0.02    | 0.01168 ± 0.00003 |                 |
| Mal-3-acet                       | 0.095 ± 0.002               | 0.153 ± 0.03    |                   |                 |
| Coumaroylated                    | 32 %                        | 13 %            | 24 %              | 36 %            |
| Pet-3-p cou                      |                             |                 |                   |                 |
| Cya-3-p cou                      |                             |                 |                   |                 |
| Peo-3-p cou                      |                             |                 | 0.0108 ± 0.0003   | 0.0129 ± 0.0003 |
| Mal-3-p cou                      | 0.095 ± 0.004               | 0.161 ± 0.004   | 0.0122 ± 0.0003   | 0.012 ± 0.002   |
| <b>TOTAL (Anthocyanidic)</b>     | 0.3                         | 1               | 0.1               | 0.07            |

#### 4S. RP-HPLC standard phenolic compounds

| Non-anthocyanidic polyphenols | Source                     |
|-------------------------------|----------------------------|
| <b>HYDROXYBENZOIC ACIDS</b>   |                            |
| Gallic acid                   | Sigma-Aldrich              |
| Syringic acid                 | Sigma-Aldrich              |
| <b>HYDROXYCINNAMIC ACIDS</b>  |                            |
| Cinamic acid                  | Sigma-Aldrich              |
| Caftaric acid                 | Sigma-Aldrich              |
| Caffeic acid                  | Sigma-Aldrich              |
| Ferulic acid                  | Sigma-Aldrich              |
| p-coumaric acid               | Sigma-Aldrich              |
| <b>STILBENES</b>              |                            |
| Trans-piceatannol             | Sigma-Aldrich              |
| pterostilbeno                 | Sigma-Aldrich              |
| trans-resveratrol             | Sigma-Aldrich              |
| <b>FLAVANOLS</b>              |                            |
| Procyanidin B1                | Sigma-Aldrich              |
| (+)-catechin                  | Sigma-Aldrich              |
| Procyanidin B2                | Sigma-Aldrich              |
| (-)-epicatechin               | Sigma-Aldrich              |
| (-)-epigallocatechin          | Sigma-Aldrich              |
| (-)-epigallocatechin gallate  | Sigma-Aldrich              |
| (-)-gallocatechin gallate     | Sigma-Aldrich              |
| Astilbin                      | Sigma-Aldrich              |
| <b>FLAVANONES</b>             |                            |
| Naringin                      | Sigma-Aldrich              |
| Naringenin                    | Sigma-Aldrich              |
| <b>FLAVONOLS</b>              |                            |
| Rutin-trihidrate              | Sigma-Aldrich              |
| Quercetin-3-glucoside         | Sigma-Aldrich              |
| Kaempferol-3-glucoside        | Sigma-Aldrich              |
| Myricetin                     | Sigma-Aldrich              |
| Quercetin hydrate             | Sigma-Aldrich              |
| quercetin 3-β-D-galactoside   | Sigma-Aldrich              |
| <b>CHALCONES</b>              |                            |
| Phloridzin                    | Sigma-Aldrich              |
| <b>OTHER COMPOUNDS</b>        |                            |
| OH-Tyrosol                    | Fluka (Buchs, Switzerland) |
| Tyrosol                       | Fluka (Buchs, Switzerland) |

#### Anthocyanidic polyphenols

|                                    |               |             |
|------------------------------------|---------------|-------------|
| Malvidin-3-O-glucoside chloride    | Sigma-Aldrich | Mal-3-G     |
| Delphinidin-3-glycoside            | *             | Del-3-G     |
| Cyanidin-3-glycoside               | *             | Cya-3-G     |
| Petunidin-3-glycoside              | *             | Pet-3-G     |
| Peonidin-3-glycoside               | *             | Peo-3-G     |
| Delphinidin-3-acetylglucoside      | *             | Del-3-acet  |
| Petunidin-3-acetylglucoside        | *             | Pet-3-acet  |
| Peonidin-3-acetylglucoside         | *             | Peo-3-acet  |
| Malvinidin-3-acetylglucoside       | *             | Mal-3-acet  |
| Cyanidin-3-p-coumaroyl glycoside   | *             | Cya-3-p cou |
| Petunidin-3-p-coumaroyl glycoside  | *             | Pet-3-p cou |
| Peonidin-3-p-coumaroyl glycoside   | *             | Peo-3-p cou |
| Malvinidin-3-p-coumaroyl glycoside | *             | Mal-3-p cou |

\*the content of individual anthocyanins was expressed as malvidin-3-glucoside equivalents using an external standard calibration curve for this compound ( $1-250\text{mg L}^{-1}$ ,  $r^2 = 0.997$ ).

#### 4S. Acronyms

| Abbreviation   |                                                                            |
|----------------|----------------------------------------------------------------------------|
| <b>A20</b>     | Bread with 20% amaranth flour replacement                                  |
| <b>A20GP5</b>  | Bread with 20% amaranth flour + 5% red grape peel flour replacement        |
| <b>AAPH</b>    | 2,2'-Azobis(2-methylpropionamidine) dihydrochloride                        |
| <b>ABTS</b>    | 2,2'-Azino-bis(3-ethylbenzothiazoline-6-sulfonic acid)                     |
| <b>AF</b>      | Amaranth flour                                                             |
| $a_w$          | water activity                                                             |
| <b>C</b>       | 100% wheat flour bread (CONTROL)                                           |
| <b>DA20</b>    | Bread with 20% amaranth flour replacement digest                           |
| <b>DA20GP5</b> | Bread with 20% amaranth flour + 5% red grape peel flour replacement digest |
| <b>DC</b>      | 100% wheat flour bread digest                                              |
| <b>DF</b>      | Dietary fibre                                                              |
| <b>DGP5</b>    | Bread with 5% red grape peel flour replacement digest                      |
| <b>d.m.</b>    | dry basis                                                                  |
| <b>EC</b>      | (-)-epicatechin                                                            |
| <b>EGC</b>     | (-)-epigallocatechin                                                       |
| <b>EGCG</b>    | (-)-epigallocatechin gallate                                               |
| <b>ESP</b>     | Esterified phenol fraction                                                 |
| <b>FA</b>      | Formic acid                                                                |
| <b>FP</b>      | Free phenol fraction                                                       |
| <b>GAE</b>     | Gallic acid equivalents                                                    |
| <b>GCG</b>     | (-)-gallocatechin gallate                                                  |
| <b>GP</b>      | Red grape peel flour                                                       |
| <b>GP5</b>     | Bread with 5% red grape peel flour replacement                             |
| <b>IDF</b>     | Insoluble dietary fibre                                                    |
| <b>LIP</b>     | Linked insoluble phenol fraction                                           |
| <b>mDP</b>     | mean degree of polymerisation                                              |
| <b>MeCN</b>    | Acetonitrile                                                               |
| <b>MeOH</b>    | Methanol                                                                   |
| <b>ORAC</b>    | Oxygen Radical Absorption Capacity                                         |
| <b>PC</b>      | Phenolic compounds                                                         |
| <b>SDF</b>     | Soluble dietary fibre                                                      |
| <b>SGID</b>    | Simulated gastrointestinal digestion                                       |
| <b>TDF</b>     | Total dietary fibre                                                        |
| <b>TE</b>      | Trolox equivalents                                                         |
| <b>TP</b>      | Total phenols                                                              |
| <b>WF</b>      | Wheat flour                                                                |
